# Supplementary material for: A chiral stannate as an “ansa” π-arene ligand in rhodium chemistry
Source: Royal Society of Chemistry journal article supplement (doi:10.1039/b716064j), 2007-11-15
Supplement: b716064j.pdf [file b716064j.pdf]

## Supporting Information for

### A Chiral Stannate as an “Ansa” $\pi$ -Arene Ligand in Rhodium Chemistry

Michaela Kilian, Hubert Wadepohl and Lutz H. Gade

#### General Experimental

All manipulations were performed under an inert gas atmosphere of dried argon (desiccant P<sub>4</sub>O<sub>10</sub>, Granusic<sup>®</sup>, J.T. Baker) in standard (Schlenk) glassware or by working in a glove box. All reaction flasks were heated prior to use using three evacuation-refill cycles. Solvents and solutions were transferred by canula-septa techniques. Solvents were dried according to standard methods and saturated with argon and stored over potassium mirror. MeSi{SiMe<sub>2</sub>NH[(*R*)-CHMePh]}<sub>3</sub><sup>[1]</sup> was prepared analogous to its (*S*)-enantiomer. [RhCl(C<sub>2</sub>H<sub>4</sub>)<sub>2</sub>]<sub>2</sub><sup>[2]</sup> and [RhCl(COE)<sub>2</sub>]<sub>2</sub><sup>[3]</sup> were synthesized according to literature procedures. Rhodium precursors were dried over MgSO<sub>4</sub> as a solution in dichloromethane. The solutions were reduced in vacuo and the complexes were precipitated by adding hexane. [RhCl(P<sup>*i*</sup>Pr<sub>3</sub>)<sub>2</sub>]<sub>2</sub><sup>[4]</sup> was prepared in situ according to Werner et al.. All other reagents were commercially available and used as received. <sup>1</sup>H, <sup>7</sup>Li, <sup>13</sup>C, <sup>29</sup>Si, <sup>31</sup>P and <sup>119</sup>Sn-NMR spectra were recorded on a Bruker DRX 200, Avance II 400 or Avance III 600. NMR spectra are quoted in ppm relative to tetramethylsilane (<sup>1</sup>H and <sup>13</sup>C); <sup>7</sup>Li, <sup>29</sup>Si, <sup>31</sup>P and <sup>119</sup>Sn-NMR data are listed in ppm relative to an external standard (<sup>7</sup>Li: LiCl<sub>aq</sub>, <sup>29</sup>Si: Si(CH<sub>3</sub>)<sub>4</sub>, <sup>31</sup>P: 85% H<sub>3</sub>PO<sub>4</sub> and <sup>119</sup>Sn: Sn(CH<sub>3</sub>)<sub>4</sub>). <sup>1</sup>H- and <sup>13</sup>C-NMR-spectra were referenced internally using the residual protonated solvent peak (<sup>1</sup>H) or the carbon resonance (<sup>13</sup>C). Infrared spectra were recorded on a Varian 3100 FT-IR spectrometer. Elemental analyses were carried out in the microanalytical laboratory of the chemistry department of Heidelberg.

**MeSi{SiMe<sub>2</sub>N[(*R*)-CHMePh]}<sub>3</sub>SnLi (1).** MeSi{SiMe<sub>2</sub>NH[(*R*)-CHMePh]}<sub>3</sub> (2.000 g, 3.46 mmol) was dissolved in Et<sub>2</sub>O and cooled to -78 °C. Then a 2.5 M solution of n-BuLi (4.6 ml, 11.5 mmol) in hexane was added. Afterwards it was warmed to room temperature and stirred for 2 h. Again the temperature was decreased to -78 °C and the reaction solution was transferred to solid SnCl<sub>2</sub> (695 mg, 3.72 mmol). The orange suspension was allowed to warm to room temperature within 18 h. The solvent was removed in vacuo and the product was extracted with hexane. After concentrating the solution the product was isolated by

crystallization at  $-30\text{ }^{\circ}\text{C}$ . **2** was washed with hexane and dried in vacuo to yield a light yellow powder (1.140 g, 47 %). (Found: C, 53.42; H, 7.16; N, 5.85. Calc. for  $\text{C}_{31}\text{H}_{48}\text{LiN}_3\text{Si}_4\text{Sn}$ : C, 53.14; H, 6.90; N, 6.00%);  $\nu_{\text{max}}(\text{KBr})/\text{cm}^{-1}$  3025w, 2958w, 2892w, 1491w, 1450w, 1400w, 1368w, 1245m, 1200w, 1120m, 1031w, 944m, 838s, 778s and 760s;  $^1\text{H-NMR}$  (400 MHz,  $\text{C}_6\text{D}_6$ ):  $\delta = 7.72$  (d,  $^3J_{\text{HH}} = 7.7$  Hz, 2H, Ph), 7.31 (t,  $^3J_{\text{HH}} = 7.7$  Hz, 2H, Ph), 7.2 (d,  $^3J_{\text{HH}} = 7.2$  Hz, 2H, Ph), 7.12 (m, 1H, Ph), 7.08 – 6.95 (m, 5H, Ph), 6.94 – 6.86 (m, 1H, Ph), 6.62 (d,  $^3J_{\text{HH}} = 7.2$  Hz, 2H, Ph), 5.04 (q,  $^3J_{\text{HH}} = 6.6$  Hz, 1H, *CHMePh*), 4.48 (q,  $^3J_{\text{HH}} = 6.8$  Hz, 1H, *CHMePh*), 4.33 (q,  $^3J_{\text{HH}} = 6.8$  Hz, 1H, *CHMePh*), 1.90 (d,  $^3J_{\text{HH}} = 6.8$  Hz, 9H,  $\text{CH}(\text{CH}_3)\text{Ph}$ ), 1.45 (d,  $^3J_{\text{HH}} = 6.8$  Hz, 9H,  $\text{CH}(\text{CH}_3)\text{Ph}$ ), 1.29 (d,  $^3J_{\text{HH}} = 6.8$  Hz, 9H,  $\text{CH}(\text{CH}_3)\text{Ph}$ ), 0.62 (s, 6H,  $\text{Si}(\text{CH}_3)_2$ ), 0.48 (s, 3H,  $\text{Si}(\text{CH}_3)_2$ ), 0.40 (s, 3H,  $\text{Si}(\text{CH}_3)_2$ ), 0.29 (s, 3H,  $\text{Si}(\text{CH}_3)_2$ ), 0.08 (s, 3H,  $\text{SiCH}_3$ ), -0.54 (s, 3H,  $\text{Si}(\text{CH}_3)_2$ );  $^7\text{Li-NMR}$  (155.4 MHz,  $\text{C}_6\text{D}_6$ ):  $\delta = 0.23$  (s);  $^{13}\text{C-NMR}$  (100.6 MHz,  $\text{C}_6\text{D}_6$ ):  $\delta = 150.3$  (s, 1-Ph), 149.6 (s, 1-Ph), 149.5 (s, 1-Ph), 131.1 (s, 3,5-Ph), 129.4 (s, 3,5-Ph), 128.6 (s, 2,6-Ph), ca. 127.9 (s, 3,5-Ph), 127.6 (s, 4-Ph), 126.6 (s, 4-Ph), 126.4 (s, 2,6-Ph), 126.4 (s, 2,6-Ph), 126.0 (s, 4-Ph), 58.9 (s, *CHMePh*), 56.5 (s, 2x *CHMePh*), 27.0 (s,  $\text{CH}(\text{CH}_3)\text{Ph}$ ), 24.4 (s,  $\text{CH}(\text{CH}_3)\text{Ph}$ ), 23.9 (s,  $\text{CH}(\text{CH}_3)\text{Ph}$ ), 5.3 (s,  $\text{Si}(\text{CH}_3)_2$ ), 5.0 (s,  $\text{Si}(\text{CH}_3)_2$ ), 4.6 (s,  $\text{Si}(\text{CH}_3)_2$ ), 3.9 (s,  $\text{Si}(\text{CH}_3)_2$ ), 3.5 (s,  $\text{Si}(\text{CH}_3)_2$ ), 3.4 (s,  $\text{Si}(\text{CH}_3)_2$ ), -15.2 (s,  $\text{SiCH}_3$ );  $^{29}\text{Si-NMR}$  (79.4 MHz,  $\text{C}_6\text{D}_6$ ):  $\delta = -5.6$  (s,  $\text{SiMe}_2$ ), -5.9 (s,  $\text{SiMe}_2$ ), -8.0 (s,  $\text{SiMe}_2$ ), -97.8 (s,  $\text{SiMe}$ );  $^{119}\text{Sn-NMR}$  (149.1 MHz,  $\text{C}_6\text{D}_6$ ):  $\delta = 11.9$  (s).

**[MeSi{SiMe<sub>2</sub>N[(*R*)-CHMePh]}<sub>2</sub>Sn{SiMe<sub>2</sub>N[(*R*)-CHMe- $\eta^6$ -Ph]}Rh(COE)] (**2a**). At  $-78\text{ }^{\circ}\text{C}$  precooled toluene was added to a mixture of  $\text{MeSi}\{\text{SiMe}_2\text{N}[(\textit{R})\text{-CHMePh}]\}_3\text{SnLi}$  (**1**) (458 mg, 0.656 mmol) and  $[\text{RhCl}(\text{COE})_2]_2$  (235 mg, 0.328 mmol). The reaction mixture was stirred for 10 min before it was allowed to warm to room temperature. Insolubilities were removed by centrifugation. The solvent was distilled off in vacuo to yield a brown powder (543 mg, 92 %). (Found: C, 51.43; H, 6.86; N, 4.52. Calc. for  $\text{C}_{39}\text{H}_{62}\text{N}_3\text{RhSi}_4\text{Sn}$ : C, 51.65; H, 6.89; N, 4.63%);  $\nu_{\text{max}}(\text{KBr})/\text{cm}^{-1}$  3061w, 3017w, 2925w, 2893m, 2802w, 1599w, 1486w, 1446m, 1415w, 1241m, 1196m, 1129m, 1070m, 1018m, 966s, 936m, 828s, 798s, 763s and 704m;  $^1\text{H-NMR}$  (400 MHz,  $\text{C}_6\text{D}_6$ ):  $\delta = 7.76$  (d,  $^3J_{\text{HH}} = 8.0$  Hz, 2H, 2,6-*H*<sub>Ph</sub>), 7.69 (d,  $^3J_{\text{HH}} = 8.0$  Hz, 2H, 2,6-*H*<sub>Ph</sub>), 7.31 (t,  $^3J_{\text{HH}} = 7.7$  Hz, 2H, 3,5-*H*<sub>Ph</sub>), 7.30 (t,  $^3J_{\text{HH}} = 7.7$  Hz, 2H, 3,5-*H*<sub>Ph</sub>), 7.20 (m, 2H, 4-*H*<sub>Ph</sub>), 6.14 (d,  $^3J_{\text{HH}} = 6.3$  Hz, 1H, 2,6-*H* <sub>$\eta^6$ -Ph</sub>), 5.86 (d,  $^3J_{\text{HH}} = 6.3$  Hz, 1H, 2,6-*H* <sub>$\eta^6$ -Ph</sub>), 5.38 (t,  $^3J_{\text{HH}} = 6.2$  Hz, 1H, 3,5-*H* <sub>$\eta^6$ -Ph</sub>), 5.27 (d,  $^3J_{\text{HH}} = 6.1$  Hz, 1H, 3,5-*H* <sub>$\eta^6$ -Ph</sub>), 5.02 (q,  $^3J_{\text{HH}} = 7.1$  Hz, 1H, *CHMePh*), 5.01 (q,  $^3J_{\text{HH}} = 7.1$  Hz, 1H, *CHMePh*), 4.62 (t,  $^3J_{\text{HH}} = 6.2$  Hz, 1H, 4-*H* <sub>$\eta^6$ -Ph</sub>), 3.88 (q,  $^3J_{\text{HH}} = 6.2$  Hz, 1H, *CHMe- $\eta^6$ -Ph*), 2.85 – 2.70 (m, 1H, *CH*<sub>COE</sub>), 2.60 – 2.45 (m, 1H, *CH*<sub>COE</sub>), 1.86 (d,  $^3J_{\text{HH}} = 6.9$  Hz, 3H,  $\text{CH}(\text{CH}_3)\text{Ph}$ ), 1.82 – 1.75 (m, 1H,**

$\text{CH}_2$  COE), 1.67 (d,  $^3J_{\text{HH}} = 6.9$  Hz, 3H,  $\text{CH}(\text{CH}_3)\text{Ph}$ ), 1.65 – 1.60 (m, 1H,  $\text{CH}_2$  COE), 1.42 (d,  $^3J_{\text{HH}} = 6.1$  Hz, 3H,  $\text{CH}(\text{CH}_3)\text{-}\eta^6\text{-Ph}$ ), 1.20 – 1.05 (m, 4H,  $\text{CH}_2$  COE), 1.02 – 0.80 (m, 6H,  $\text{CH}_2$  COE), 0.70 (s, 3H,  $\text{Si}(\text{CH}_3)_2$ ), 0.68 (s, 3H,  $\text{Si}(\text{CH}_3)_2$ ), 0.64 (s, 3H,  $\text{Si}(\text{CH}_3)_2$ ), 0.57 (s, 3H,  $\text{Si}(\text{CH}_3)_2$ ), 0.41 (s, 3H,  $\text{Si}(\text{CH}_3)_2$ ), 0.39 (s, 3H,  $\text{Si}(\text{CH}_3)_2$ ), 0.23 (s, 3H,  $\text{Si}(\text{CH}_3)_2$ );  $^{13}\text{C}$ -NMR (100.6 MHz,  $\text{C}_6\text{D}_6$ ):  $\delta = 151.0$  (s, 1- $\text{C}_{\text{Ph}}$ ), 149.7 (s, 1- $\text{C}_{\text{Ph}}$ ), 128.1 (s, 3,5- $\text{C}_{\text{Ph}}$ ), 127.8 (s, 3,5- $\text{C}_{\text{Ph}}$ ), 127.8 (s, 2,6- $\text{C}_{\text{Ph}}$ ), 127.4 (s, 2,6- $\text{C}_{\text{Ph}}$ ), 126.1 (s, 4- $\text{C}_{\text{Ph}}$ ), 126.0 (s, 4- $\text{C}_{\text{Ph}}$ ), 124.5 (d,  $^1J(^{103}\text{Rh}\text{-}^{13}\text{C}) = 4.2$  Hz, 1- $\text{C}_{\eta^6\text{-Ph}}$ ), 102.6 (s, br, 3,5- $\text{C}_{\eta^6\text{-Ph}}$ ), 102.2 (s, br, 3,5- $\text{C}_{\eta^6\text{-Ph}}$ ), 95.3 (d,  $^1J(^{103}\text{Rh}\text{-}^{13}\text{C}) = 2.5$  Hz, 2,6- $\text{C}_{\eta^6\text{-Ph}}$ ), 94.7 (s, br, 4- $\text{C}_{\eta^6\text{-Ph}}$ ), 92.5 (s,  $^1J(^{103}\text{Rh}\text{-}^{13}\text{C}) = 2.6$  Hz, 2,6- $\text{C}_{\eta^6\text{-Ph}}$ ), 60.1 (d,  $^1J(^{103}\text{Rh}\text{-}^{13}\text{C}) = 14.9$  Hz,  $\text{CH}_{\text{COE}}$ ), 59.7 (d,  $^1J(^{103}\text{Rh}\text{-}^{13}\text{C}) = 14.1$  Hz,  $\text{CH}_{\text{COE}}$ ), 57.7 (s,  $\text{CHMePh}$ ), 57.5 (s,  $\text{CHMePh}$ ), 54.4 (s,  $\text{CHMe-}\eta^6\text{-Ph}$ ), 34.6 (s,  $\text{CH}_2$  COE), 32.5 (s,  $\text{CH}_2$  COE), 32.3 (s,  $\text{CH}_2$  COE), 27.5 (s,  $\text{CH}(\text{CH}_3)\text{Ph}$ ), 27.1 (s,  $\text{CH}(\text{CH}_3)\text{Ph}$ ), 26.6 (s,  $\text{CH}_2$  COE), 26.4 (s,  $\text{CH}_2$  COE), 25.8 (s,  $\text{CH}(\text{CH}_3)\text{-}\eta^6\text{-Ph}$ ), 25.6 (s,  $\text{CH}_2$  COE), 7.1 (s,  $\text{Si}(\text{CH}_3)_2$ ), 6.6 (s,  $\text{Si}(\text{CH}_3)_2$ ), 6.2 (s,  $\text{Si}(\text{CH}_3)_2$ ), 4.4 (s,  $\text{Si}(\text{CH}_3)_2$ ), 4.2 (s,  $\text{Si}(\text{CH}_3)_2$ ), 2.5 (s,  $\text{Si}(\text{CH}_3)_2$ ), -15.2 (s,  $\text{SiCH}_3$ );  $^{29}\text{Si}$ -NMR (79.4 MHz,  $\text{C}_6\text{D}_6$ ):  $\delta = -2.8$  (s,  $\text{SiMe}_2$ ), -3.3 (s,  $\text{SiMe}_2$ ), -4.4 (s,  $\text{SiMe}_2$ ), -98.7 (s,  $\text{SiMe}$ );  $^{119}\text{Sn}$ -NMR (149.1 MHz,  $\text{C}_6\text{D}_6$ ):  $\delta = -34.3$  (d,  $^1J(^{119}\text{Sn}\text{-}^{103}\text{Rh}) = 995$  Hz).

**[MeSi{SiMe<sub>2</sub>N[(R)-CHMePh]}<sub>2</sub>Sn{SiMe<sub>2</sub>N[(R)-CHMe- $\eta^6$ -Ph]}Rh(C<sub>2</sub>H<sub>4</sub>)] (2b).** At -78 °C a solution of  $[\text{RhCl}(\text{C}_2\text{H}_4)_2]_2$  (56 mg, 0.144 mmol) in toluene was added to a solution of  $\text{MeSi}\{\text{SiMe}_2\text{N}[(\text{R})\text{-CHMePh}]\}_3\text{SnLi}$  (**1**) (200 mg, 0.285 mmol) in toluene. The reaction mixture was stirred for 30 min and then it was allowed to warm to room temperature. Insolubilities were separated by centrifugation. The centrifugate was concentrated in vacuo and storing at -30 °C yielded a brown powder (179 mg, 76 %). (Found: C, 47.82; H, 6.35; N, 4.92. Calc. for  $\text{C}_{33}\text{H}_{52}\text{N}_3\text{RhSi}_4\text{Sn}$ : C, 48.06; H, 6.36; N, 5.09%);  $\nu_{\text{max}}(\text{KBr})/\text{cm}^{-1}$  3058w, 2957m, 2891m, 1599w, 1491m, 1448m, 1406w, 1365m, 1241s, 1195m, 1103s, 1066m, 944s, 833s, 780s, and 756s;  $^1\text{H}$ -NMR (400 MHz,  $\text{C}_6\text{D}_6$ ):  $\delta = 7.71$  (d,  $^3J_{\text{HH}} = 7.6$  Hz, 2H, 2,6- $H_{\text{Ph}}$ ), 7.67 (d,  $^3J_{\text{HH}} = 7.6$  Hz, 2H, 2,6- $H_{\text{Ph}}$ ), 7.31 (t,  $^3J_{\text{HH}} = 7.5$  Hz, 4H, 3,5- $H_{\text{Ph}}$ ), 7.23 – 7.16 (m, 2H, 4- $H_{\text{Ph}}$ ), 6.23 (d,  $^3J_{\text{HH}} = 6.1$  Hz, 1H, 2,6- $H_{\eta^6\text{-Ph}}$ ), 5.83 (d,  $^3J_{\text{HH}} = 6.1$  Hz, 1H, 2,6- $H_{\eta^6\text{-Ph}}$ ), 5.37 (t,  $^3J_{\text{HH}} = 6.0$  Hz, 1H, 3,5- $H_{\eta^6\text{-Ph}}$ ), 5.22 (d,  $^3J_{\text{HH}} = 5.9$  Hz, 1H, 3,5- $H_{\eta^6\text{-Ph}}$ ), 5.00 (q,  $^3J_{\text{HH}} = 6.7$  Hz, 1H,  $\text{CHMePh}$ ), 4.90 (q,  $^3J_{\text{HH}} = 6.7$  Hz, 1H,  $\text{CHMePh}$ ), 4.24 (t,  $^3J_{\text{HH}} = 6.1$  Hz, 1H, 4- $H_{\eta^6\text{-Ph}}$ ), 4.94 (q,  $^3J_{\text{HH}} = 6.1$  Hz, 1H,  $\text{CHMePh}$ ), 2.33 – 2.16 (m, 4H,  $\text{C}_2\text{H}_4$ ), 1.79 (d,  $^3J_{\text{HH}} = 6.8$  Hz, 3H,  $\text{CH}(\text{CH}_3)\text{Ph}$ ), 1.60 (d,  $^3J_{\text{HH}} = 6.7$  Hz, 3H,  $\text{CH}(\text{CH}_3)\text{Ph}$ ), 1.40 (d,  $^3J_{\text{HH}} = 6.2$  Hz, 3H,  $\text{CH}(\text{CH}_3)\text{-}\eta^6\text{-Ph}$ ), 0.69 (s, 3H,  $\text{Si}(\text{CH}_3)_2$ ), 0.67 (s, 3H,  $\text{Si}(\text{CH}_3)_2$ ), 0.61 (s, 3H,  $\text{Si}(\text{CH}_3)_2$ ), 0.59 (s, 3H,  $\text{Si}(\text{CH}_3)_2$ ), 0.36 (s, 3H,  $\text{Si}(\text{CH}_3)_2$ ), 0.32 (s, 3H,  $\text{Si}(\text{CH}_3)_2$ ), 0.21 (s, 3H,  $\text{SiCH}_3$ );  $^{13}\text{C}$ -NMR (100.6 MHz,  $\text{C}_6\text{D}_6$ ):  $\delta = 150.8$  (s, 1- $\text{C}_{\text{Ph}}$ ), 149.8 (s, 1- $\text{C}_{\text{Ph}}$ ), 128.0 (s, 3,5- $\text{C}_{\text{Ph}}$ ), 127.9

(s, 3,5- $C_{Ph}$ ), 127.8 (s, 2,6- $C_{Ph}$ ), 127.7 (s, 2,6- $C_{Ph}$ ), 127.4 (d,  $^1J(^{103}Rh-^{13}C) = 4.5$  Hz, 1- $C_{\eta^6-Ph}$ ), 126.2 (s, 4- $C_{Ph}$ ), 126.0 (s, 4- $C_{Ph}$ ), 100.4 (d,  $^1J(^{103}Rh-^{13}C) = 1.7$  Hz, 3,5- $C_{\eta^6-Ph}$ ), 98.8 (d,  $^1J(^{103}Rh-^{13}C) = 1.5$  Hz, 3,5- $C_{\eta^6-Ph}$ ), 96.4 (d,  $^1J(^{103}Rh-^{13}C) = 2.8$  Hz, 2,6- $C_{\eta^6-Ph}$ ), 94.6 (d,  $^1J(^{103}Rh-^{13}C) = 2.4$  Hz, 2,6- $C_{\eta^6-Ph}$ ), 94.5 (d,  $^1J(^{103}Rh-^{13}C) = 0.9$  Hz, 4- $C_{\eta^6-Ph}$ ), 58.3 (s, CHMePh), 57.6 (s, CHMePh), 53.6 (s, CHMe- $\eta^6-Ph$ ), 34.0 (d,  $^1J(^{103}Rh-^{13}C) = 14.2$  Hz,  $C_2H_4$ ), 27.3 (s, CH( $CH_3$ )Ph), 27.2 (s, CH( $CH_3$ )Ph), 25.3 (s, CH( $CH_3$ )- $\eta^6-Ph$ ), 7.2 (s, Si( $CH_3$ ) $_2$ ), 7.1 (s, Si( $CH_3$ ) $_2$ ), 6.2 (s, Si( $CH_3$ ) $_2$ ), 4.9 (s, Si( $CH_3$ ) $_2$ ), 3.6 (s, Si( $CH_3$ ) $_2$ ), 2.6 (s, Si( $CH_3$ ) $_2$ ), -15.2 (s, SiCH $_3$ );  $^{29}Si$ -NMR (79.4 MHz,  $C_6D_6$ ):  $\delta = -2.1$  (s, SiMe $_2$ ), -2.7 (s, SiMe $_2$ ), -3.2 (s, SiMe $_2$ ), -98.0 (s, SiMe);  $^{119}Sn$ -NMR (149.1 MHz,  $C_6D_6$ ):  $\delta = -16.8$  (d,  $^1J(^{119}Sn-^{103}Rh) = 944$  Hz).

**[MeSi{SiMe $_2$ N[(*R*)-CHMePh]} $_2$ Sn{SiMe $_2$ N[(*R*)-CHMe- $\eta^6-Ph$ ]}Rh( $P^iPr_3$ )] (3).**  $P^iPr_3$  (190  $\mu$ l, 0.992 mmol) was added drop wise to a suspension of [RhCl(COE) $_2$ ] $_2$  (93 mg, 0.130 mmol) in pentane. After 10 min the solvent was distilled off in vacuo and the purple residue was washed with acetone. It was dried in vacuo before the solid was redissolved in toluene and added to a solution of MeSi{SiMe $_2$ N[(*R*)-CHMePh]} $_3$ SnLi (1) (182 mg, 0.260 mmol) in toluene at -78  $^\circ$ C. After 15 min in the cold the reaction mixture was allowed to warm to room temperature. Insolubilities were removed by centrifugation and the brown solution was concentrated in vacuo. Storing at -30  $^\circ$ C yielded brown crystals (167 mg, 61 %), suitable for X-ray diffraction studies. (Found: C, 49.92; H, 7.30; N, 4.53. Calc. for  $C_{40}H_{69}N_3PRhSi_4Sn$ : C, 50.21; H, 7.27; N, 4.39 %);  $\nu_{max}(KBr)/cm^{-1}$  3055w, 2951w, 2927w, 2867w, 1491w, 1444m, 1411w, 1365w, 1041m, 827w, 748w and 700w;  $^1H$ -NMR (400 MHz,  $C_6D_6$ ):  $\delta = 7.82$  (d,  $^3J_{HH} = 7.8$  Hz, 2H, 2,6- $H_{Ph}$ ), 7.67 (d,  $^3J_{HH} = 7.9$  Hz, 2H, 2,6- $H_{Ph}$ ), 7.38 (t,  $^3J_{HH} = 7.8$  Hz, 2H, 3,5- $H_{Ph}$ ), 7.27 (t,  $^3J_{HH} = 7.8$  Hz, 2H, 3,5- $H_{Ph}$ ), 7.16 (m,  $^3J_{HH} = 7.3$  Hz, 2H, 4- $H_{Ph}$ ), 7.11 (m,  $^3J_{HH} = 7.3$  Hz, 2H, 4- $H_{Ph}$ ), 6.43 (d,  $^3J_{HH} = 6.1$  Hz, 1H, 2,6- $H_{\eta^6-Ph}$ ), 5.67 (t,  $^3J_{HH} = 6.0$  Hz, 1H, 3,5- $H_{\eta^6-Ph}$ ), 5.40 (t,  $^3J_{HH} = 6.1$  Hz, 1H, 3,5- $H_{\eta^6-Ph}$ ), 5.35 (d,  $^3J_{HH} = 5.9$  Hz, 1H, 2,6- $H_{\eta^6-Ph}$ ), 5.17 (m, 1H, CHMePh), 4.75 (m, 1H, CHMePh), 4.70 (t,  $^3J_{HH} = 5.9$  Hz, 1H, 4- $H_{\eta^6-Ph}$ ), 3.89 (m, 1H, CHMe- $\eta^6-Ph$ ), 1.84 (d,  $^3J_{HH} = 6.7$  Hz, 3H, CH( $CH_3$ )Ph), 1.81 (d,  $^3J_{HH} = 7.3$  Hz, 3H, CH( $CH_3$ )Ph), 1.53 – 1.39 (m, 3H, P[CH( $CH_3$ ) $_2$ ] $_3$ ), 1.42 (d,  $^3J_{HH} = 6.3$  Hz, 3H, CH( $CH_3$ )- $\eta^6-Ph$ ), 0.89 – 0.78 (m, 18H, P[CH( $CH_3$ ) $_2$ ] $_3$ ), 0.84 (s, 3H, Si( $CH_3$ ) $_2$ ), 0.75 (s, 3H, Si( $CH_3$ ) $_2$ ), 0.72 (s, 3H, Si( $CH_3$ ) $_2$ ), 0.64 (s, 3H, Si( $CH_3$ ) $_2$ ), 0.59 (s, 3H, Si( $CH_3$ ) $_2$ ), 0.25 (s, 3H, SiCH $_3$ ), 0.24 (s, 3H, Si( $CH_3$ ) $_2$ );  $^{13}C$ -NMR (100.6 MHz,  $C_6D_6$ ):  $\delta = 151.3$  (s, 1- $C_{Ph}$ ), 149.1 (s, 1- $C_{Ph}$ ), 128.2 (s, 2,6- $C_{Ph}$ ), 128.1 (s, 2,6- $C_{Ph}$ ), 127.7 (s, 3,5- $C_{Ph}$ ), 127.5 (s, 3,5- $C_{Ph}$ ), 126.0 (s, 4- $C_{Ph}$ ), 125.6 (s, 4- $C_{Ph}$ ), 120.5 (s, 1- $C_{\eta^6-Ph}$ ), 97.3 (s, 3,5- $C_{\eta^6-Ph}$ ), 95.5 (s, 2,6- $C_{\eta^6-Ph}$ ), 94.5 (s, 2,6- $C_{\eta^6-Ph}$ ), 93.7 (s, 3,5- $C_{\eta^6-Ph}$ ), 88.8 (s, 4- $C_{\eta^6-Ph}$ ), 59.5 (s, CHMePh), 57.3 (s, CHMePh), 53.6

(s, CHMe- $\eta^6$ -Ph), 29.7 (d,  $^1J(^{31}\text{P}-^{13}\text{C}) = 20.2$  Hz, P[CH(CH<sub>3</sub>)<sub>2</sub>]), 27.3 (s, CH(CH<sub>3</sub>)Ph), 25.5 (s, CH(CH<sub>3</sub>)- $\eta^6$ -Ph), 25.3 (s, CH(CH<sub>3</sub>)Ph), 20.5 (P[CH(CH<sub>3</sub>)<sub>2</sub>]), 19.9 (P[CH(CH<sub>3</sub>)<sub>2</sub>]), 9.6 (s, Si(CH<sub>3</sub>)<sub>2</sub>), 7.9 (s, Si(CH<sub>3</sub>)<sub>2</sub>), 7.1 (s, Si(CH<sub>3</sub>)<sub>2</sub>), 6.5 (s, Si(CH<sub>3</sub>)<sub>2</sub>), 6.4 (s, Si(CH<sub>3</sub>)<sub>2</sub>), 1.7 (s, Si(CH<sub>3</sub>)<sub>2</sub>), -15.1 (s, SiCH<sub>3</sub>);  $^{29}\text{Si}$ -NMR (79.4 MHz, C<sub>6</sub>D<sub>6</sub>):  $\delta = -2.8$  (s, SiMe<sub>2</sub>), -3.6 (s, SiMe<sub>2</sub>), -5.6 (s, SiMe<sub>2</sub>), -99.6 (s, SiMe);  $^{31}\text{P}$ -NMR (161.9 MHz, C<sub>6</sub>D<sub>6</sub>):  $\delta = 68.0$  (d,  $^1J(^{103}\text{Rh}-^{31}\text{P}) = 224$  Hz,  $^2J(^{119}\text{Sn}-^{31}\text{P}) = 198$  Hz,  $^2J(^{117}\text{Sn}-^{31}\text{P}) = 190$  Hz, SnRh( $\eta^6$ -Ph)(P<sup>i</sup>Pr<sub>3</sub>));  $^{119}\text{Sn}$ -NMR (149.1 MHz, C<sub>6</sub>D<sub>6</sub>):  $\delta = 30.0$  (dd,  $^1J(^{119}\text{Sn}-^{103}\text{Rh}) = 1087$  Hz,  $^2J(^{119}\text{Sn}-^{31}\text{P}) = 199$  Hz).

## References

- 1 M. Schubart, B. Findeis, L. H. Gade, W.-S. Li, M. McPartlin, *Chem. Ber.* 1995, **128**, 329.
- 2 J. L. Herde, J. C. Lambert, C. V. Senoff, *Inorg. Synth.* 1974, **15**, 14.
- 3 A. van der Ent, A. L. Onderdelinden, *Inorg. Synth.* 1990, **28**, 90.
- 4 H. Werner, J. Wolf, A. Höhn, *J. Organomet. Chem.* 1985, **287**, 395.
